# Supplementary material for: CYP3A4 mutation causes vitamin D–dependent rickets type 3
Source: JCI journal article supplement (doi:10.1172/jci98680), 2018-02-20
Supplement: sd1 [file 1]

**SUPPLEMENTAL APPENDIX: A RECURRENT *CYP3A4* MUTATION AS A NOVEL CAUSE OF RICKETS**

|                                                                                                                      |          |
|----------------------------------------------------------------------------------------------------------------------|----------|
| <b>Supplementary Methods</b>                                                                                         | <b>2</b> |
| Isolation of genomic DNA and Sanger sequencing.....                                                                  | 2        |
| <i>In Vitro</i> assessment of expression and activity of CYP3A4.....                                                 | 2        |
| Semi-quantitative immunoblot of transfected CYP3A4 protein.....                                                      | 2        |
| Determination of uncommonly used reference intervals.....                                                            | 2        |
| More detailed information regarding the clinical course of each subject.....                                         | 2        |
| Subject 1.1.....                                                                                                     | 2        |
| Subject 2.1.....                                                                                                     | 2        |
| <b>Supplementary Tables</b>                                                                                          | <b>3</b> |
| Table S1. Rare variants identified in subject 1.1 & subject 2.1 that fit an autosomal dominant model of disease..... | 3        |
| <b>References</b>                                                                                                    | <b>8</b> |

## ***Supplementary Methods***

### *Public databases searched for rare variants*

1,000 Genomes Project, ESP6500SI, ExAC, and gnomAD

### *Cell lines*

All cell lines were obtained from ATCC and have been cultured continuously in our lab.

### *Isolation of genomic DNA and Sanger sequencing*

We extracted genomic DNA from peripheral blood mononuclear cells of affected patients and available family members using standard methods. Candidate genes were analyzed by Sanger sequencing of both strands.

### *In Vitro assessment of expression and activity of CYP3A4*

Mutations were introduced by PCR site-directed mutagenesis into a full-length human *CYP3A4* cDNA (generously provided by Dr. P.F. Hollenberg, University of Michigan, Ann Arbor, Michigan, USA(1)), and nucleotide changes were verified by sequencing. Expression of recombinant CYP3A4 proteins was assessed by immunoblot analysis of whole cell lysates of transiently transfected HEK293T cells. We used a mammalian two-hybrid expression system in which activity of a firefly luciferase reporter protein is proportional to the concentration of intracellular 1,25-dihydroxyvitamin D to assess the ability of recombinant CYP enzymes to oxidize 1,25-dihydroxyvitamin D<sub>3</sub>(2). Transfected cells were incubated with 1,25-dihydroxyvitamin D<sub>3</sub> or vehicle, and luciferase activity was measured as previously described(2). Briefly, HEK 293T cells were transiently co-transfected with Renilla luciferase to control for transfection efficiency plus the hybrid firefly luciferase reporter system, a P450-oxoreductase (P450-POR) cDNA and either empty vector, CYP24A1, or wild type or mutant CYP3A4 plasmid constructs as previously described(2). Immunoblot of CYP3A4 was performed as described as previously with minor changes(3).

To assess the ability of recombinant CYP3A4 enzymes to oxidize an alternative substrate HEK293T cells were transiently transfected as above, and were then incubated with the bioluminescent substrate luciferin isopropyl (Luciferin IPA, Promega) at a final concentration of 0.012 mM. Control wells included 20 μM of ketoconazole, a selective inhibitor of CYP3A4.

### *Semi-quantitative immunoblot of transfected CYP3A4 protein.*

Immunoblot of CYP3A4 was performed as described as previously with minor changes(3). In brief, 25 ug of total protein from transfected cells was separated using an SDS/PAGE gradient gel (Invitrogen) and transferred onto a Nitrocellulose membrane. This was blocked for 1 h in Tris-buffered saline containing 5% nonfat dry milk, and the membrane was incubated overnight with a 1:500 dilution of polyclonal rabbit antibody to CYP3A4(4), washed and then incubated with a horseradish peroxidase conjugated secondary antibody (Catalog number # RPN4301GE Biosciences Piscataway, NJ) and developed with an enhanced chemifluorescence kit (GE Biosciences, Piscataway, NJ).

### *Determining reference ranges for uncommon labs*

For lab reference ranges such as values for 4β,25-dihydroxyvitamin D<sub>3</sub>/25-dihydroxyvitamin D<sub>3</sub>, serum cholecalciferol, 25-hydroxyvitamin D and 1,25-dihydroxyvitamin D after a 50,000 IU bolus in a rickets affected population where there are not widely used lab reference ranges, we used published values(5) and unpublished values from our recent manuscript(5) and a method described by Hozo, et al(6) for estimation of the mean and standard deviation from the median and range and the reference range was defined as the mean ± 2 standard deviations.

### ***More detailed information regarding the clinical course of each subject.***

*Subject 1.1:* Our first subject was remarkable for the absence of any recognizable risk factors for vitamin D deficiency rickets. At two and a half years old, this anglosaxon girl was initially referred to a paediatric endocrinologist (CR) by her local rural paediatrician who had diagnosed rickets (25 OH vit D < 16 nmol/l; TCa 1.67mmol/l (2.2 - 2.6); PO4 1.14mmol/l; ALP 2,826iu/l; PTH 58.3pmol/l) and had given her oral calcitriol 0.5mcg daily with calcium supplements for one month with no improvement in her rickets. Her parents had raised concerns about her “bow legs” and unsteady gait from aged 20 months. She had an uneventful birth with a birth weight of 7lbs 12ozs and was formula fed. On specific questioning her parents reported that she had had several episodes of brief spasms in her upper and lower limbs during sleep. She had been otherwise active and healthy, and spent much of the day outdoors. Both of

her parents and her older brother were healthy, and there was no family history of calcium or skeletal disorders. Dietary history revealed adequate dietary calcium intake and a generally well balanced diet. On examination, her height of 81.3 cm was between 3<sup>rd</sup> -10<sup>th</sup> centile and her weight was 11.5kg (25 – 50<sup>th</sup>%), she had palpable rachitic rosary, with bilateral wrist swelling, leg bowing and left tibial torsion.

A presumptive diagnosis of vitamin D resistant rickets made (due to presumed vitamin D receptor mutation), and she was commenced on oral calcitriol and doses were increased over 2 months from 0.5 – 1.5mcg/day, with no improvement in her serum calcium.

A vitamin D generation test(7) was then administered giving Calciferol 600,000 iu via nasogastric tube as an inpatient. Five days later her total serum calcium increased to near normal to 2.02 mmol/l (2.2 – 2.6) and her 25 OH vitamin D increased to 97 nmol/l, excluding 25 hydroxyase deficiency.

Following this testing she was given weekly intravenous calcitriol 0.25 mcg increasing to calcitriol 12 mcg thrice weekly over 2 months together with calcium supplementation 1.8gm orally daily. As a result, her calcium normalised, alkaline phosphatase decreased and rachitic changes improved radiologically. However, the local hospital was unable to provide an ongoing budget for the large doses of parenteral calcitriol required.

On review of her Vitamin D generation test and noting her improved calcium on a bolus dose of 600,000 IU calciferol orally, she was commenced on a trial of calciferol syrup 50,000iu daily. At 8 years of age after five and a half years of treatment with calciferol 20,000 – 50,000iu/day, her leg bowing had resolved, with sustained resolution of her rickets biochemically and radiologically. Her height centiles had also increased to 25 – 50th % more appropriate for her mid parental height around the 25<sup>th</sup> centile. She continued on high dose calciferol for another 3 – 4 years. At aged 13 years she had not taken calciferol for over a year, she had undergone normal puberty and was menstruating regularly. She was then lost to follow-up for several years and then she re-presented complaining of bone pain. We undertook genetic and biochemical testing as described in this paper when she was aged 20 years.

#### *Subject 2.1*

On presentation at the age of 16 in England she was being treated with 4 mcg of calcitriol daily and 500 mg of elemental calcium. X-rays of her wrists (Figure S1) revealed osteopenia and metaphyseal lucency. She had a low serum calcium of 1.87 an elevated PTH (75 pmol.L (normal range 1.6-6.9) and a low 25-hydroxyvitamin D (16.5 nmol/L). Calcitriol and calcium were stopped and Ergocalciferol 15,000 units per day was initiated with no improvement in results. Oral Ergocalciferol was stopped and due to physician concern about compliance she was given IM Ergocalciferol 300,000 units with no improvement. Bone pain worsened and a trial of oral phosphate supplementation with alfacalcidol led to spontaneous insufficiency fractures of the proximal tibia and pelvis. She was then eventually transitioned to 50,000 IU of cholecalciferol daily with normalization in her labs.

| Genomic location | Function | Gene           | MAF in 1000 Genomes Project | MAF in ESP6500SI | dbSNP       | SIFT | Polyphen2 | Annotation                                            | Occurrence in ExAC |
|------------------|----------|----------------|-----------------------------|------------------|-------------|------|-----------|-------------------------------------------------------|--------------------|
| Subject 1.1      |          |                |                             |                  |             |      |           |                                                       |                    |
| 1:16736367       | Missense | <i>SPATA21</i> | NA                          | 0.000077         | NA          | 0    | 0.996     | SPATA21:NM_198546:exon6:c.316C>T:p.R106W              | 6                  |
| 1:43102988       | Missense | <i>CCDC30</i>  | NA                          | NA               | NA          | 0.05 | 0.284     | CCDC30:NM_001080850:exon11:c.1577G>A:p.R526Q          | 2                  |
| 1:78180308       | Missense | <i>USP33</i>   | NA                          | 0.000077         | rs139228998 | 0.61 | 0         | USP33:NM_201624:exon19:c.2206A>G:p.I736V              | 2                  |
| 10:104678284     | Missense | <i>CNNM2</i>   | NA                          | 0.00008          | NA          | 0    | 0.402     | CNNM2:NM_017649:exon1:c.47G>A:p.G16E                  | 3                  |
| 11:2291058       | Missense | <i>ASCL2</i>   | NA                          | NA               | NA          | 0.19 | 0.941     | ASCL2:NM_005170:exon1:c.505G>A:p.D169N                | NA                 |
| 11:68370941      | Missense | <i>PPP6R3</i>  | NA                          | NA               | NA          | 0.01 | 0.985     | PPP6R3:NM_001164163:exon21:c.2344G>A:p.E782K          | NA                 |
| 12:55361669      | Missense | <i>TESPA1</i>  | NA                          | NA               | NA          | 0.3  | NA        | TESPA1:NM_001098815:exon4:c.214G>A:p.E72K             | NA                 |
| 14:24676521      | Stopgain | <i>TSSK4</i>   | NA                          | NA               | NA          | NA   | NA        | TSSK4:NM_001184739:exon3:c.641dupA:p.Y214_A215delinsX | NA                 |
| 16:2230430       | Missense | <i>CASKIN1</i> | NA                          | NA               | NA          | 0.24 | 0.996     | CASKIN1:NM_020764:exon18:c.2939G>A:p.R980Q            | 2                  |
| 16:88788037      | Missense | <i>PIEZO1</i>  | NA                          | NA               | NA          | 0.02 | NA        | PIEZO1:NM_001142864:exon38:c.5312C>T:p.P1771L         | 4                  |
| 17:7726902       | Missense | <i>DNAH2</i>   | NA                          | 0.000154         | NA          | 0.14 | 0.601     | DNAH2:NM_020877:exon74:c.11285A>C:p.H3762P            | 6                  |
| 18:19424179      | Missense | <i>MIB1</i>    | NA                          | NA               | NA          | NA   | 0.059     | MIB1:NM_020774:exon15:c.2176A>G:p.K726E               | NA                 |
| 18:30825229      | Missense | <i>CCDC178</i> | NA                          | 0.000154         | NA          | 0.05 | 0.868     | CCDC178:NM_001105528:exon14:c.1573G>C:p.E525Q         | 3                  |
| 19:14070195      | Missense | <i>DCAF15</i>  | NA                          | 0.000078         | rs141014315 | 0.07 | 0.565     | DCAF15:NM_138353:exon7:c.1123C>A:p.P375T              | 4                  |
| 19:14094305      | Missense | <i>RFX1</i>    | NA                          | 0.000231         | rs144348762 | 0    | 0.509     | RFX1:NM_002918:exon3:c.422C>T:p.T141I                 | NA                 |
| 2:98274553       | Missense | <i>ACTR1B</i>  | NA                          | NA               | NA          | 0    | 0.997     | ACTR1B:NM_005735:exon8:c.778G>A:p.E260K               | NA                 |
| 3:47451299       | Missense | <i>PTPN23</i>  | NA                          | 0.000308         | NA          | 0.11 | 0.019     | PTPN23:NM_001304482:exon18:c.1726G>A:p.A576T          | 10                 |
| 4:183674671      | Missense | <i>TENM3</i>   | NA                          | NA               | NA          | 0    | NA        | TENM3:NM_001080477:exon21:c.3931A>T:p.N1311Y          | NA                 |
| 4:48158705       | Missense | <i>TEC</i>     | NA                          | 0.000154         | rs147079314 | 0    | 0.895     | TEC:NM_003215:exon9:c.784C>T:p.R262C                  | 9                  |
| 4:7774696        | Missense | <i>AFAP1</i>   | NA                          | 0.000077         | NA          | 0.01 | 0.001     | AFAP1:NM_198595:exon15:c.1852                         | 1                  |

|             |                        |                 |    |          |             |      |          |                                               |    |
|-------------|------------------------|-----------------|----|----------|-------------|------|----------|-----------------------------------------------|----|
|             |                        |                 |    |          |             |      |          | C>G:p.L618V                                   |    |
| 4:87695632  | Missense               | <i>PTPN13</i>   | NA | NA       | NA          | 0.19 | NA       | PTPN13:NM_080684:exon30:c.4883A>C:p.Q1628P    | NA |
| 6:32011583  | Missense               | <i>TNXB</i>     | NA | NA       | NA          | 0    | 0.324    | TNXB:NM_032470:exon4:c.760G>A:p.V254M         | NA |
| 6:33650398  | Missense               | <i>ITPR3</i>    | NA | NA       | NA          | 0    | 0.988    | ITPR3:NM_002224:exon34:c.4574G>A:p.C1525Y     | NA |
| 7:99361602  | Missense               | <i>CYP3A4</i>   | NA | NA       | NA          | 0.04 | 0.013    | CYP3A4:NM_017460:exon10:c.902T>C:p.I301T      | NA |
| 8:22054882  | Missense               | <i>BMP1</i>     | NA | NA       | NA          | 0.03 | 0.006    | BMP1:NM_001199:exon15:c.2056A>C:p.K686Q       | NA |
| 8:3611554   | Missense               | <i>CSMD1</i>    | NA | 0.000084 | NA          | 0.13 | NA       | CSMD1:NM_033225:exon6:c.829A>G:p.M277V        | 5  |
| 9:100840592 | Missense               | <i>NANS</i>     | NA | NA       | NA          | 0    | 0.999    | NANS:NM_018946:exon4:c.566C>T:p.P189L         | NA |
| 9:133755997 | Missense               | <i>ABL1</i>     | NA | 0.000077 | rs143152951 | 0.02 | 0.303    | ABL1:NM_005157:exon10:c.1624A>G:p.R542G       | 4  |
| X:119005135 | Missense               | <i>RNF113A</i>  | NA | NA       | NA          | 0.05 | 0.937    | RNF113A:NM_006978:exon1:c.442G>C:p.E148Q      | 5  |
|             |                        |                 |    |          |             |      |          |                                               |    |
| Subject 2.1 |                        |                 |    |          |             |      |          |                                               |    |
| 1:155920682 | Missense               | <i>ARHGEF2</i>  | NA | NA       | NA          | 0    | 0.98     | ARHGEF2:NM_001162383:exon20:c.2641G>C:p.D881H | NA |
| 1:248039607 | Missense               | <i>TRIM58</i>   | NA | NA       | NA          | 0.01 | 0.651    | TRIM58:NM_015431:exon6:c.1277A>G:p.N426S      | 5  |
| 1:28099852  | Nonframeshift deletion | <i>STX12</i>    | NA | NA       | NA          | NA   | NA       | STX12:NM_177424:exon1:c.35_43del;p.12_15del   | NA |
| 10:17127758 | Missense               | <i>CUBN</i>     | NA | NA       | NA          | 0.03 | 0.817    | CUBN:NM_001081:exon16:c.1948A>C:p.I650L       | NA |
| 12:57861129 | Missense               | <i>GLI1</i>     | NA | NA       | NA          | 0.09 | 0.075    | GLI1:NM_001160045:exon7:c.542G>A:p.R181Q      | 4  |
| 14:32902937 | Missense               | <i>AKAP6</i>    | NA | NA       | NA          | 0    | 0.98     | AKAP6:NM_004274:exon2:c.238A>T:p.T80S         | 8  |
| 14:36988255 | Missense               | <i>NKX2-1</i>   | NA | NA       | NA          | 0.09 | 0.923    | NKX2-1:NM_003317:exon1:c.308C>T:p.T103I       | NA |
| 14:45673638 | Missense               | <i>MIS18BP1</i> | NA | NA       | NA          | 0.02 | 0.002    | MIS18BP1:NM_018353:exon16:c.3259A>G:p.T1087A  | 2  |
| 14:77493442 | Missense               | <i>IRF2BPL</i>  | NA | NA       | NA          | 0.06 | 0.649804 | IRF2BPL:NM_024496:exon1:c.694                 | 1  |

|             |          |                |    |          |             |      |       |                                              |    |
|-------------|----------|----------------|----|----------|-------------|------|-------|----------------------------------------------|----|
|             |          |                |    |          |             |      |       | C>T:p.H232Y                                  |    |
| 16:1245507  | Missense | <i>CACNA1H</i> | NA | NA       | NA          | 1    | NA    | CACNA1H:NM_001005407:exon4:c.487C>A:p.Q163K  | NA |
| 16:20975614 | Missense | <i>DNAH3</i>   | NA | NA       | NA          | 0.17 | 0.999 | DNAH3:NM_017539:exon53:c.9592C>T:p.P3198S    | 2  |
| 16:841161   | Missense | <i>CHTF18</i>  | NA | NA       | NA          | 0.23 | NA    | CHTF18:NM_022092:exon8:c.895T>C:p.F299L      | 1  |
| 19:11565429 | Missense | <i>ELAVL3</i>  | NA | NA       | NA          | 0.42 | 0.005 | ELAVL3:NM_001420:exon7:c.1016C>T:p.A339V     | NA |
| 19:33464993 | Missense | <i>FAAP24</i>  | NA | NA       | NA          | 0.07 | 0.868 | FAAP24:NM_152266:exon4:c.271G>A:p.V91I       | 2  |
| 19:41939286 | Missense | <i>ATP5SL</i>  | NA | NA       | NA          | 0    | 0.999 | ATP5SL:NM_001167871:exon4:c.406G>A:p.D136N   | 1  |
| 19:49138861 | Missense | <i>DBP</i>     | NA | NA       | NA          | 0    | 0.654 | DBP:NM_001352:exon2:c.526G>T:p.G176W         | NA |
| 19:49142861 | Missense | <i>CA11</i>    | NA | NA       | NA          | 0    | 0.998 | CA11:NM_001217:exon6:c.585C>A:p.N195K        | NA |
| 2:20202940  | Missense | <i>MATN3</i>   | NA | NA       | NA          | 0.07 | NA    | MATN3:NM_002381:exon3:c.898G>A:p.D300N       | 8  |
| 21:45089781 | Missense | <i>RRP1B</i>   | NA | NA       | NA          | 0.32 | 0.993 | RRP1B:NM_015056:exon2:c.147A>C:p.E49D        | 2  |
| 22:25282573 | Missense | <i>SGSM1</i>   | NA | NA       | NA          | 0.82 | NA    | SGSM1:NM_001098497:exon16:c.1648G>A:p.E550K  | NA |
| 3:111764691 | Missense | <i>TMPRSS7</i> | NA | NA       | NA          | 0.12 | NA    | TMPRSS7:NM_001042575:exon4:c.253G>A:p.A85T   | NA |
| 3:156396201 | Missense | <i>TIPARP</i>  | NA | NA       | NA          | 0.01 | 0.963 | TIPARP:NM_001184717:exon2:c.715G>A:p.G239R   | NA |
| 3:165491281 | Missense | <i>BCHE</i>    | NA | NA       | NA          | 0.22 | 0.576 | BCHE:NM_000055:exon4:c.1698A>T:p.E566D       | NA |
| 3:47164922  | Missense | <i>SETD2</i>   | NA | NA       | NA          | 0    | NA    | SETD2:NM_014159:exon3:c.1204C>T:p.R402W      | 2  |
| 3:49039018  | Missense | <i>P4HTM</i>   | NA | 0.000077 | rs146471142 | 0.64 | 0     | P4HTM:NM_177938:exon3:c.584G>A:p.R195Q       | 3  |
| 5:37309320  | Missense | <i>NUP155</i>  | NA | NA       | NA          | 0.32 | 0     | NUP155:NM_001278312:exon23:c.2486A>G:p.K829R | NA |
| 7:64168571  | Missense | <i>ZNF107</i>  | NA | NA       | NA          | 0    | 0.999 | ZNF107:NM_001282360:exon3:c.2000A>G:p.H667R  | NA |
| 7:73008681  | Missense | <i>MLXIPL</i>  | NA | NA       | NA          | 0    | 0.983 | MLXIPL:NM_032951:exon16:c.2363C>T:p.T788M    | 1  |

|             |                         |               |    |          |    |      |         |                                                            |    |
|-------------|-------------------------|---------------|----|----------|----|------|---------|------------------------------------------------------------|----|
| 7:99361602  | Missense                | <i>CYP3A4</i> | NA | NA       | NA | 0.04 | 0.013   | CYP3A4:NM_017460:exon10:c.902T>C:p.I301T                   | NA |
| 8:144810594 | Missense                | <i>FAM83H</i> | NA | NA       | NA | 0    | 0.979   | FAM83H:NM_198488:exon5:c.1037C>A:p.P346Q                   | 4  |
| 8:144999415 | Missense                | <i>PLEC</i>   | NA | 0.000096 | NA | 0.09 | 0.58463 | PLEC:NM_201378:exon31:c.4640G>A:p.R1547Q                   | 8  |
| 9:139996087 | Missense                | <i>MAN1B1</i> | NA | NA       | NA | 0.01 | 0.998   | MAN1B1:NM_016219:exon8:c.1217G>A:p.R406Q                   | 2  |
| 9:35958045  | Missense                | <i>OR2S2</i>  | NA | NA       | NA | 0.01 | 0       | OR2S2:NM_019897:exon1:c.51G>T:p.R17S                       | NA |
| 9:5823956   | Missense                | <i>ERMP1</i>  | NA | NA       | NA | 0    | 1       | ERMP1:NM_024896:exon4:c.814C>T:p.R272C                     | NA |
| 9:71836309  | Nonframeshift insertion | <i>TJP2</i>   | NA | NA       | NA | NA   | NA      | TJP2:NM_001170415:exon5:c.861_862insAGCCGC:p.R287delinsRSR | 9  |
| X:129837181 | Missense                | <i>ENOX2</i>  | NA | NA       | NA | 0.49 | 0.998   | ENOX2:NM_001281736:exon3:c.10C>T:p.P4S                     | NA |

## References

1. Pratt-Hyatt, M., Zhang, H., Snider, N.T., and Hollenberg, P.F. 2010. Effects of a commonly occurring genetic polymorphism of human CYP3A4 (I118V) on the metabolism of anandamide. *Drug Metab Dispos* 38:2075-2082.
2. Thacher, T.D., Fischer, P.R., Singh, R.J., Roizen, J., and Levine, M.A. 2015. CYP2R1 Mutations Impair Generation of 25-hydroxyvitamin D and Cause an Atypical Form of Vitamin D Deficiency. *J Clin Endocrinol Metab*:jc20151746.
3. Quinney, S.K., Malireddy, S.R., Vuppalachchi, R., Hamman, M.A., Chalasani, N., Gorski, J.C., and Hall, S.D. 2013. Rate of onset of inhibition of gut-wall and hepatic CYP3A by clarithromycin. *Eur J Clin Pharmacol* 69:439-448.
4. Wang, R.W., and Lu, A.Y. 1997. Inhibitory anti-peptide antibody against human CYP3A4. *Drug Metab Dispos* 25:762-767.
5. Thacher, T.D., Fischer, P.R., Obadofin, M.O., Levine, M.A., Singh, R.J., and Pettifor, J.M. 2010. Comparison of metabolism of vitamins D2 and D3 in children with nutritional rickets. *J Bone Miner Res* 25:1988-1995.
6. Hozo, S.P., Djulbegovic, B., and Hozo, I. 2005. Estimating the mean and variance from the median, range, and the size of a sample. *BMC Med Res Methodol* 5:13.
7. Cipriani, C., Romagnoli, E., Scillitani, A., Chiodini, I., Clerico, R., Carnevale, V., Mascia, M.L., Battista, C., Viti, R., Pileri, M., et al. 2010. Effect of a single oral dose of 600,000 IU of cholecalciferol on serum calcitropic hormones in young subjects with vitamin D deficiency: a prospective intervention study. *J Clin Endocrinol Metab* 95:4771-4777.
